# Supplementary material for: A Novel Phosphoregulatory Switch Controls the Activity and Function of the Major Catalytic Subunit of Protein Kinase A in Aspergillus fumigatus
Source: PubMed Central journal article supplement (PMC5296607; doi:10.1128/mbio.02319-16), 2017-02-07
Supplement: mbo001173178sf7.pdf [file mbo001173178sf7.pdf]

Figure S7

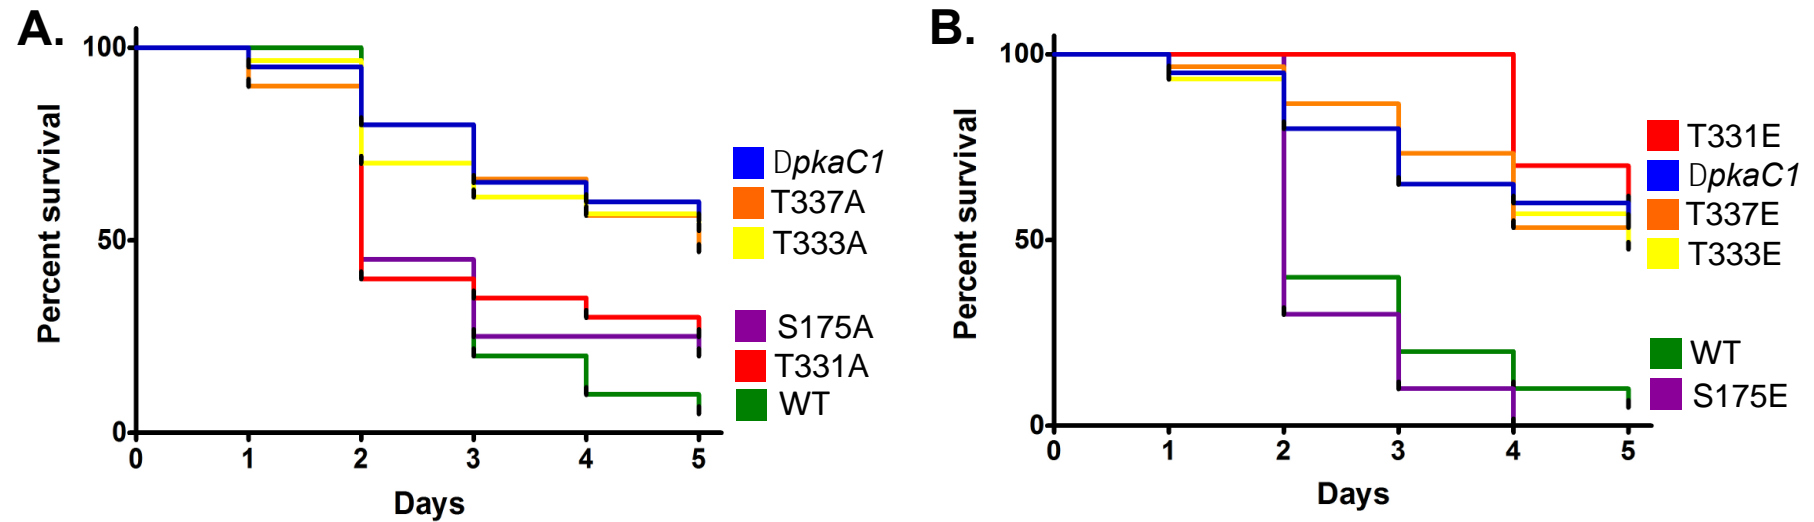

**Figure S7. Virulence of *A. fumigatus* mutants in *Galleria mellonella* infection model.** Survival of *G. mellonella* larvae infected with mutant strains was plotted using Kaplan–Meier curves and analyzed using log rank pair-wise comparison ( $P < 0.05$ ). (A, B) Virulence of (A) alanine and (B) glutamate substitution mutants in *G. mellonella*. Larvae were inoculated with  $2 \times 10^5$  conidia and incubated at  $37^\circ\text{C}$  and survival scored daily for 5 days. Mutants S175A, S175E and T331A showed wild-type level of virulence, while all other mutants had reduced virulence statistically similar to infection with the  $\Delta pkaC1$  strain.
